# Supplementary material
Source: Springer Nature journal article supplement (https://www.springermedizin.de/resource/supplementary/12911_2013_793_MOESM3_ESM.pdf/9526666)

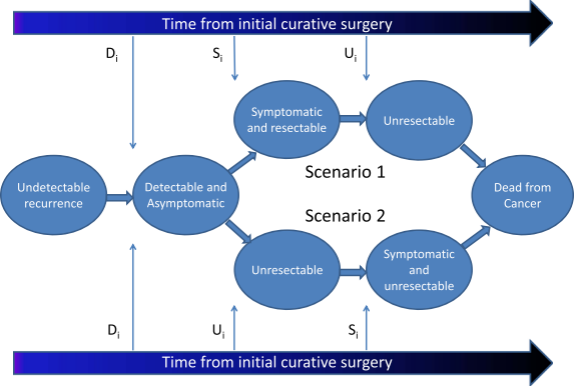

Supplement: MOESM3 [file 9526666]
